# Supplementary material for: Food Protein Sterylation: Chemical Reactions between Reactive Amino Acids and Sterol Oxidation Products under Food Processing Conditions
Source: PubMed Central journal article supplement (PMC7766307; doi:10.3390/foods9121882), 2020-12-17
Supplement: foods-09-01882-s001.pdf [file foods-09-01882-s001.pdf]

Supplementary Files.

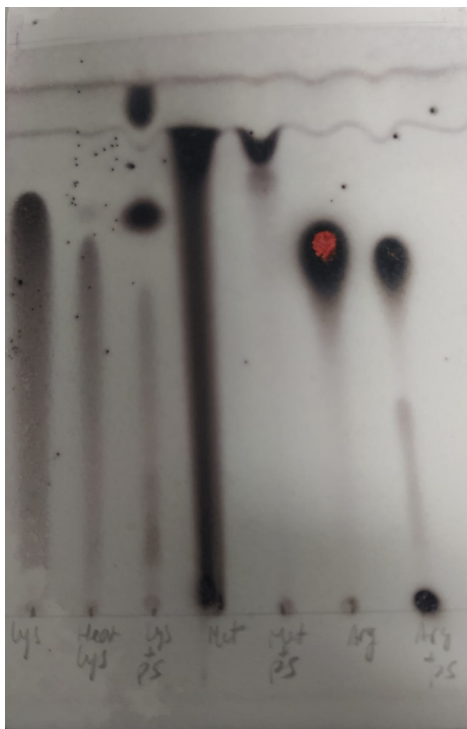

**Figure S1.** Thin Layer Chromatography (TLC) of reaction models between protected reactive amino acids ( $N_{\alpha}$ -Boc-arginine,  $N_{\alpha}$ -Boc-lysine and  $N_{\alpha}$ -Boc-methionine) and oxysterol (cholesterol  $5\alpha,6\alpha$ -epoxide). Incubation was performed at  $160^{\circ}\text{C}$  for 60 min. Spot separation was observed from mixture models containing cholesterol  $5\alpha,6\alpha$ -epoxide with  $N_{\alpha}$ -Boc-L-lysine. From left to right:  $N_{\alpha}$ -Boc-lysine (T0), Heated  $N_{\alpha}$ -Boc-lysine ( $160^{\circ}\text{C}$  for 60 min),  $N_{\alpha}$ -Boc-lysine + cholesterol  $5\alpha,6\alpha$ -epoxide,  $N_{\alpha}$ -Methionine,  $N_{\alpha}$ -Methionine + cholesterol  $5\alpha,6\alpha$ -epoxide,  $N_{\alpha}$ -Arginine,  $N_{\alpha}$ -Arginine + cholesterol  $5\alpha,6\alpha$ -epoxide.

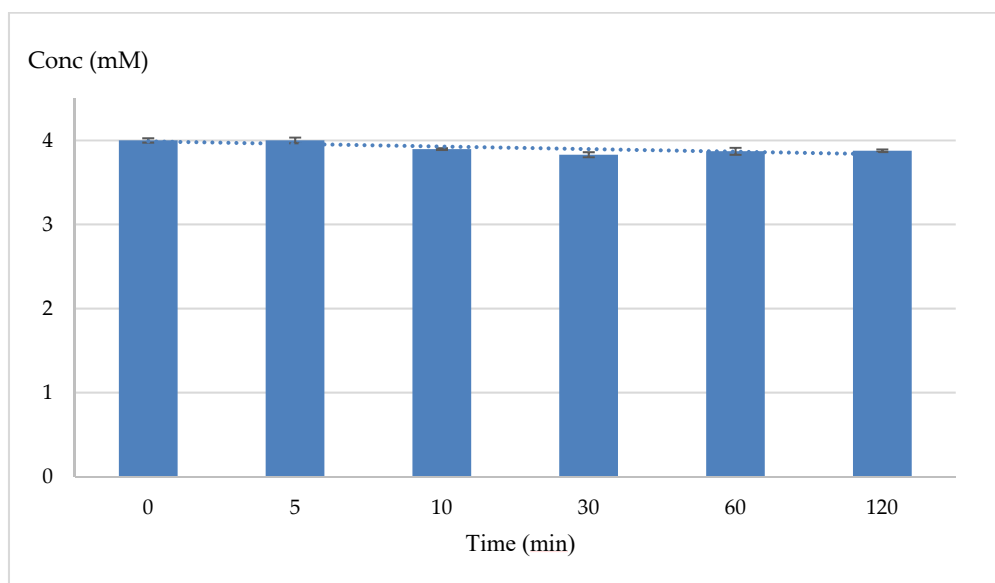

**Figure S2.** Levels of cholesterol  $5\alpha,6\alpha$ -epoxide in blank samples over the incubation time at  $180^{\circ}\text{C}$ .
